# Supplementary material
Source: PubMed Central journal article supplement (PMC4863564)
Supplement: mmc1.pdf [file mmc1.pdf]

**The American Journal of Human Genetics, Volume 98**

**Supplemental Data**

**A Common Polymorphism in *HIBCH*  
Influences Methylmalonic Acid Concentrations  
in Blood Independently of Cobalamin**

**Anne M. Molloy, Faith Pangilinan, James L. Mills, Barry Shane, Mary B. O'Neill, David M. McGaughey, Aneliya Velkova, Hatice Ozel Abaan, Per M. Ueland, Helene McNulty, Mary Ward, J.J. Strain, Conal Cunningham, Miriam Casey, Cheryl D. Cropp, Yoonhee Kim, Joan E. Bailey-Wilson, Alexander F. Wilson, and Lawrence C. Brody**

**Figure S1.** Q-Q Plot of association results of  $\log_{10}$  transformed MMA with age and sex adjustment, using 758,443 genotyped SNPs after QC; plot truncated at  $-\log_{10}(p) = 10$  and excluding chromosomes 2 and 16.

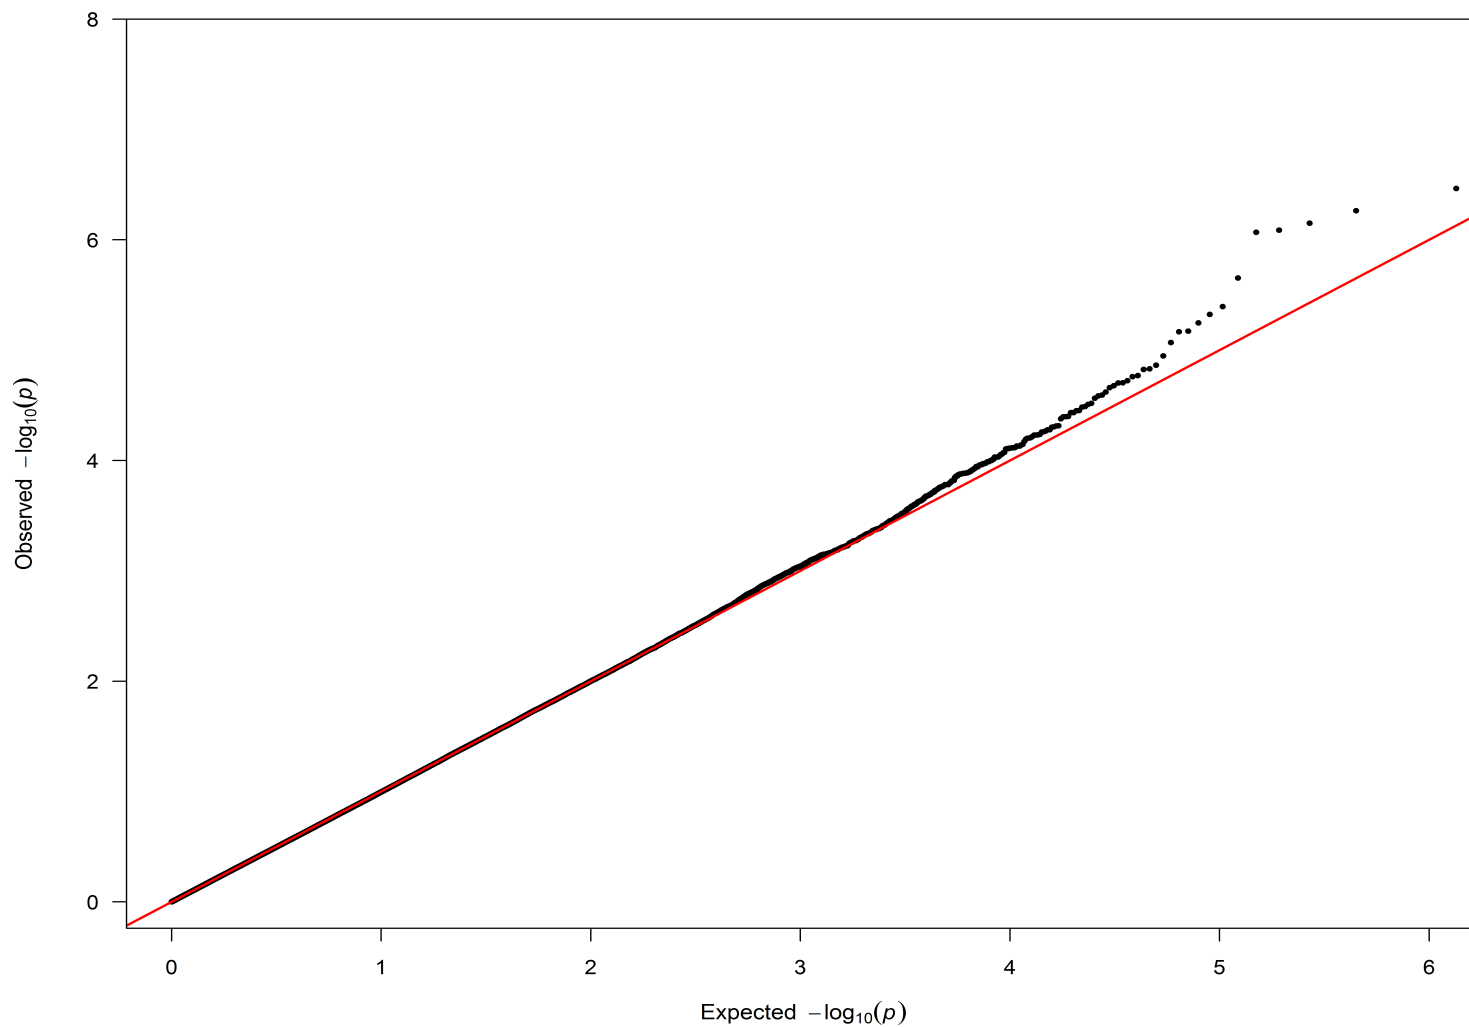

**Figure S2.** Manhattan Plot of association results of  $\log_{10}$  transformed MMA with age and sex adjustment, using 2,350,751 imputed genotypes (HapMapII panel) after QC (imputation quality  $R^2 > 0.5$ ). Two horizontal lines in the plot represent: red:  $-\log_{10}(p) = 5$  ( $p = 1 \times 10^{-5}$ ) : Suggestive significance; and blue:  $-\log_{10}(p) = 7.3$  ( $p = 5 \times 10^{-8}$ ) : Genome-wide significance.

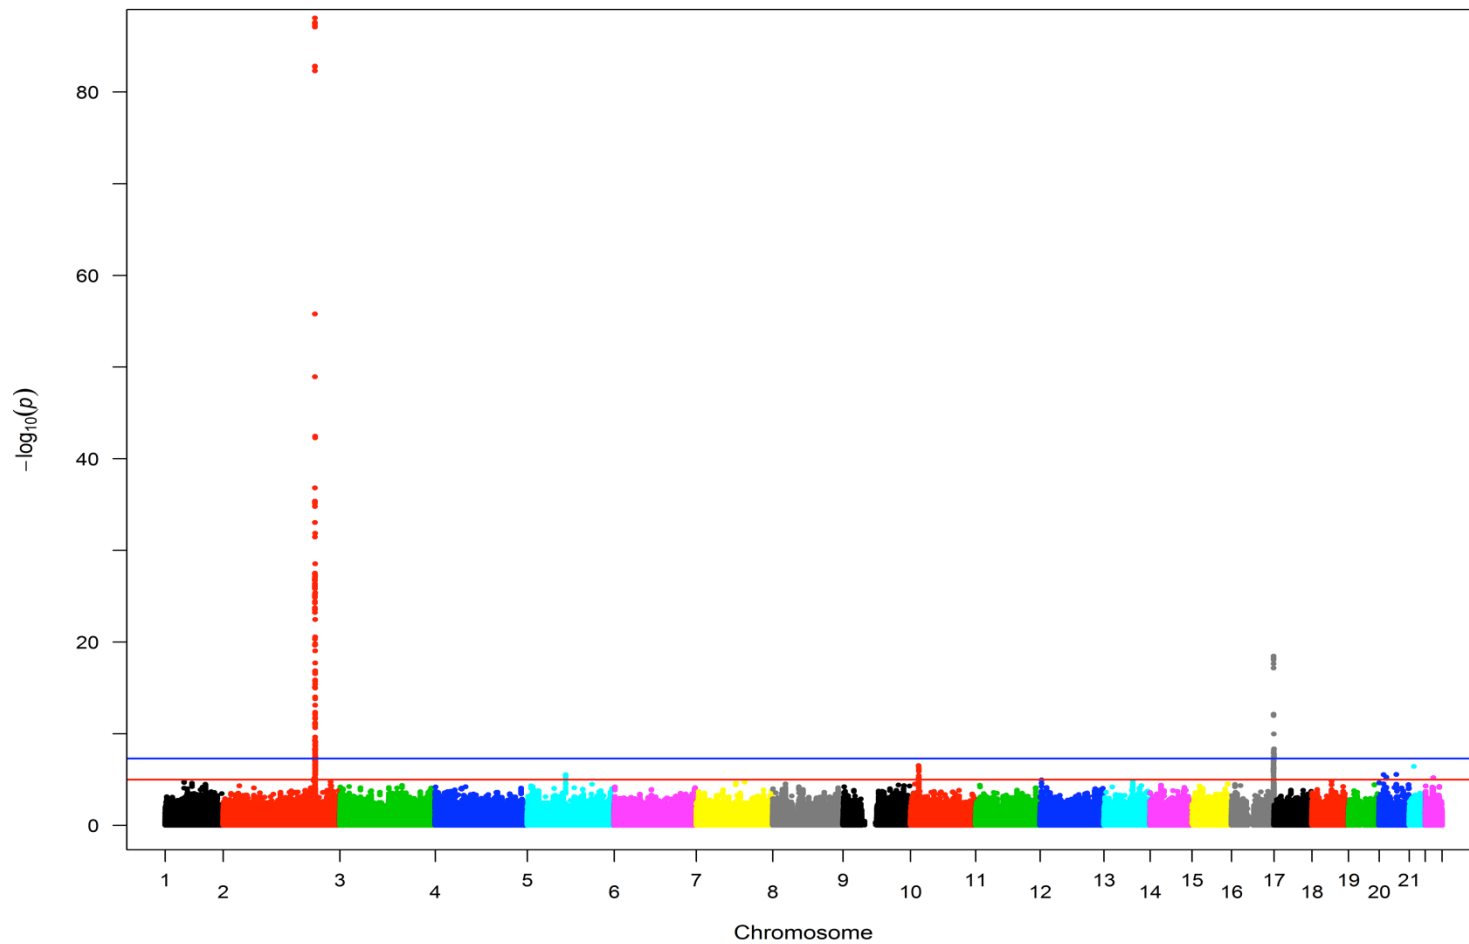

**Figure S3.** A) Q-Q Plot of association results of  $\log_{10}$  transformed MMA with age and sex adjustment, using 2,350,751 imputed genotypes (HapMapII panel) after QC (imputation quality  $R^2 > 0.5$ ); B) Same plot truncated at  $-\log_{10}(p) = 10$ ; C) Same plot excluding chromosomes 2 and 16.

A)

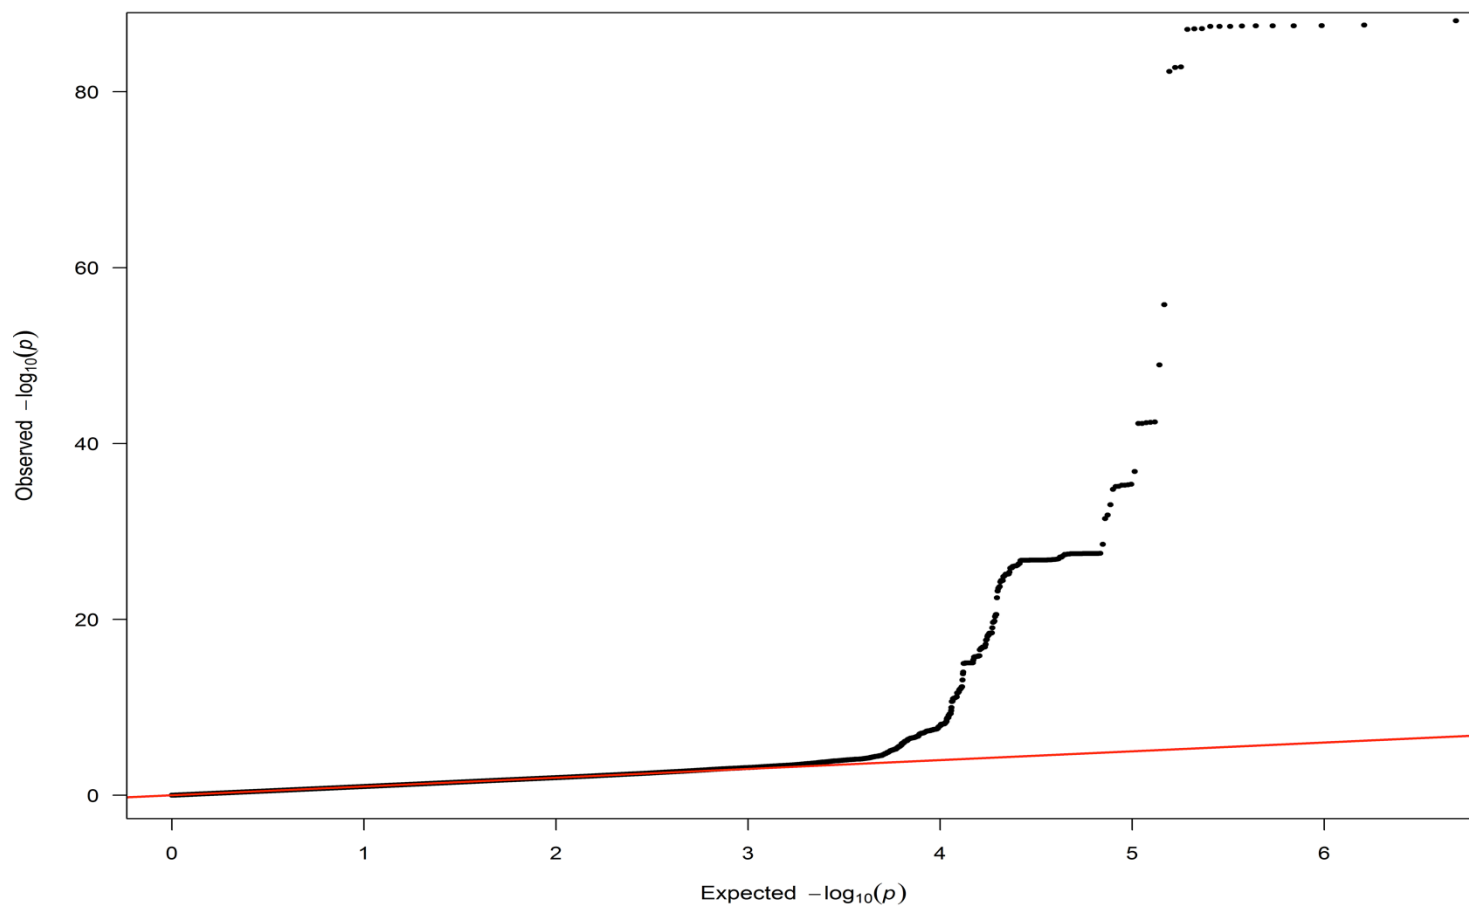

B)

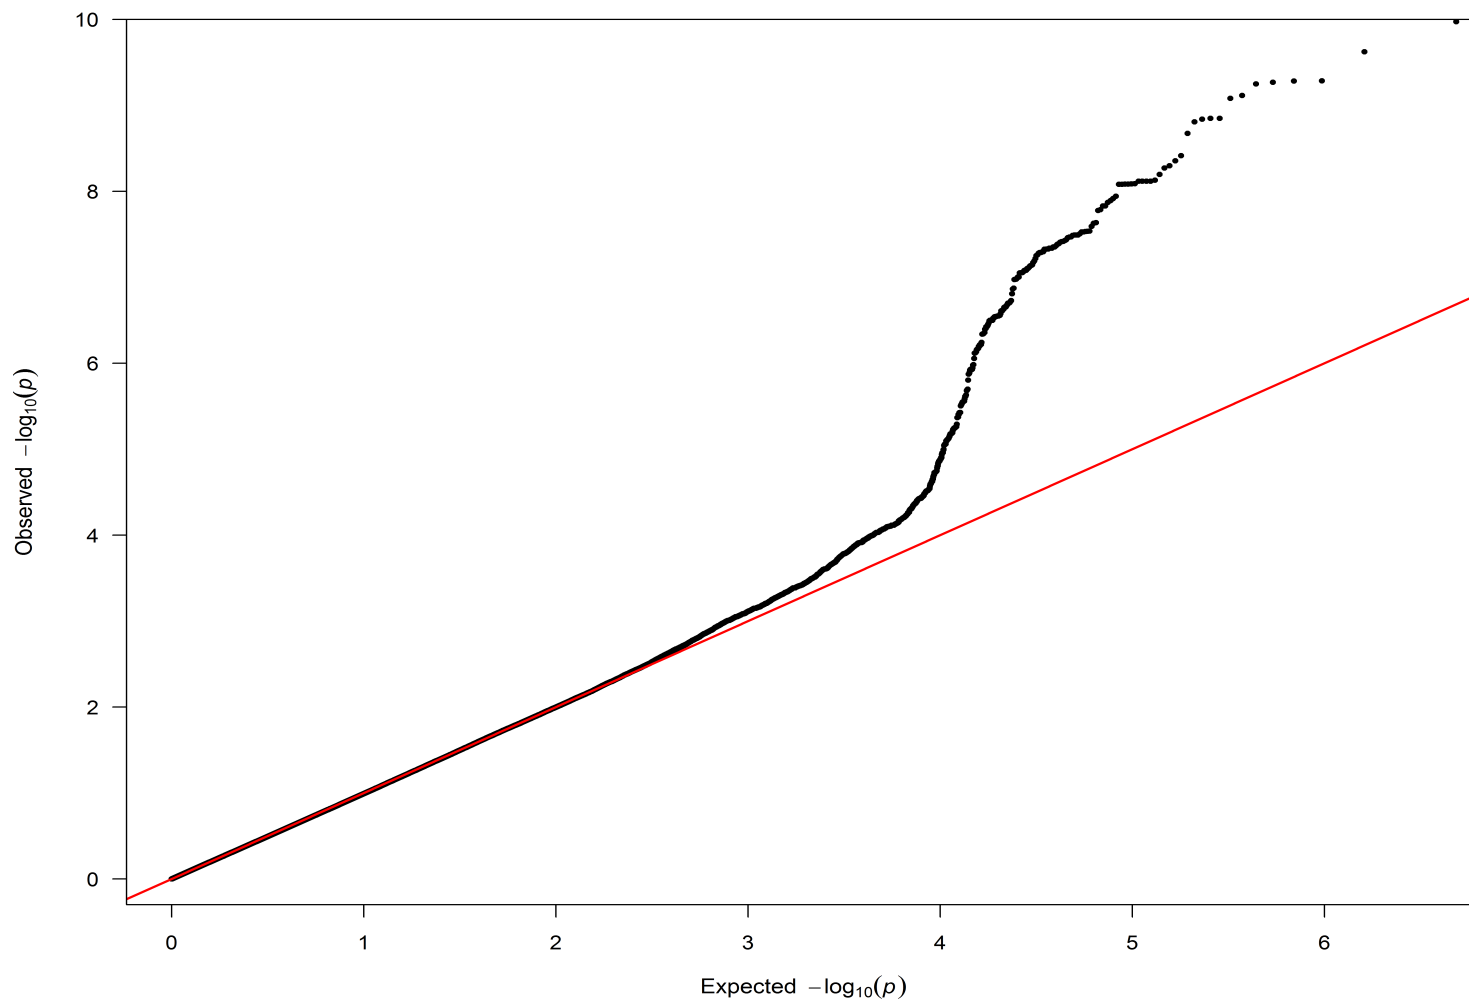

c)

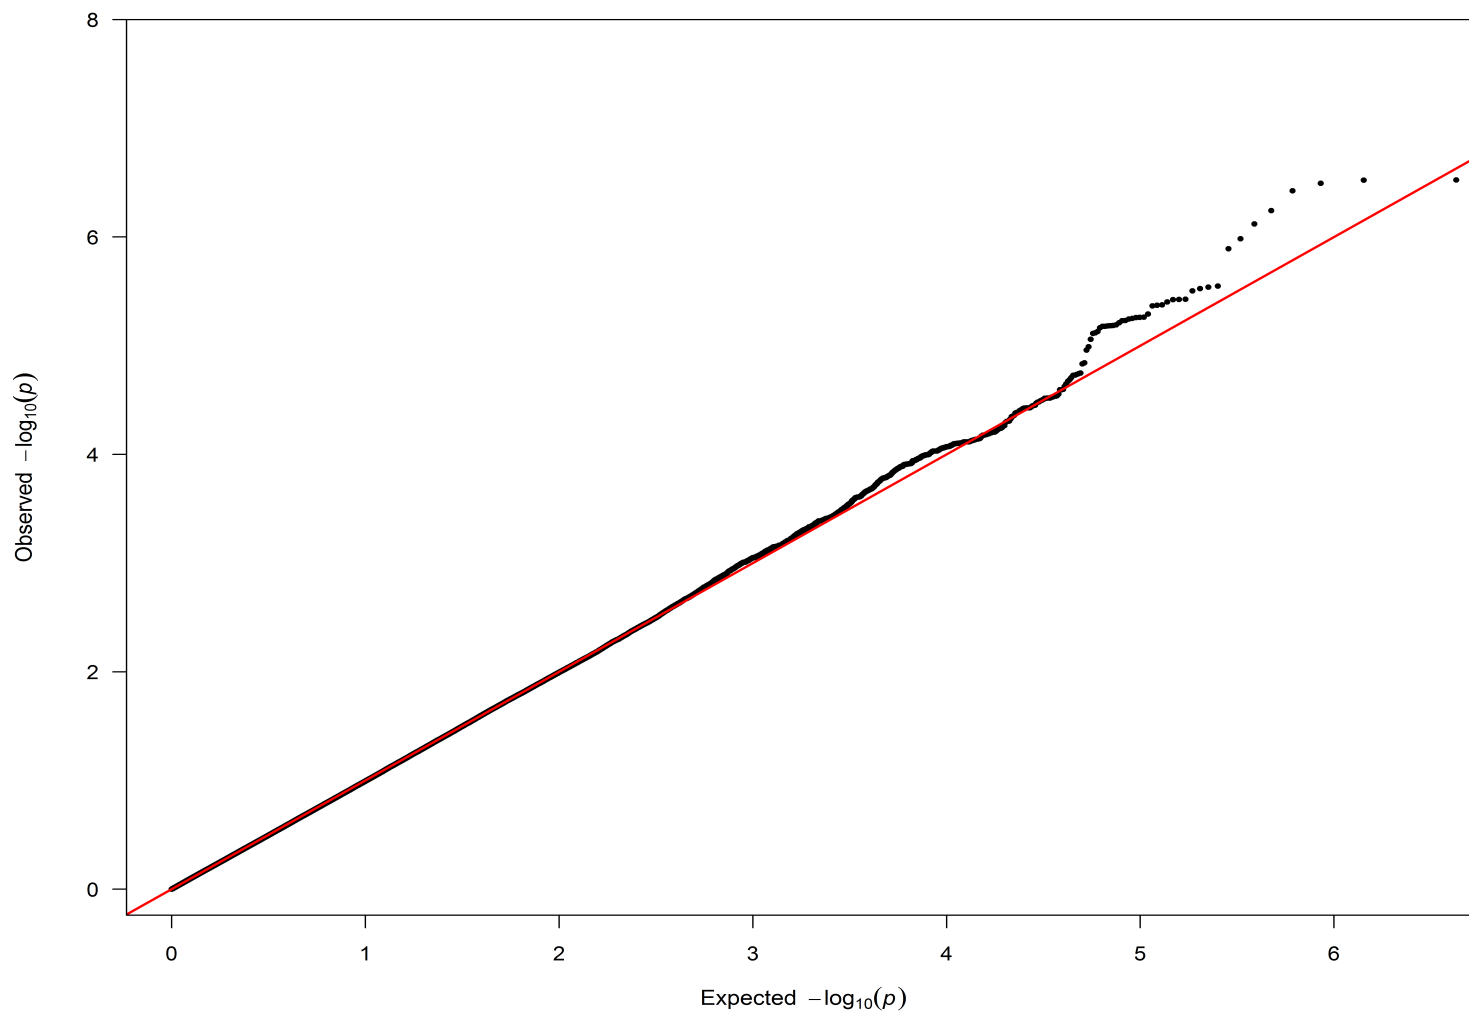

**Figure S4.** Western blotting of cellular fractions for HIBCH. Subcellular fractions of thirteen Coriell lymphoblastoid cell lines were collected using the Qproteome Cell compartment Kit (Qiagen). The cytoplasmic (C), membrane (including mitochondria, M) and nuclear (N) fractions are shown. Western blotting was performed with antibodies to heat shock protein A9 (HSPA9) or HIBCH, as shown. Fraction purity was assessed by blotting for HSPA9, which localizes to mitochondria.

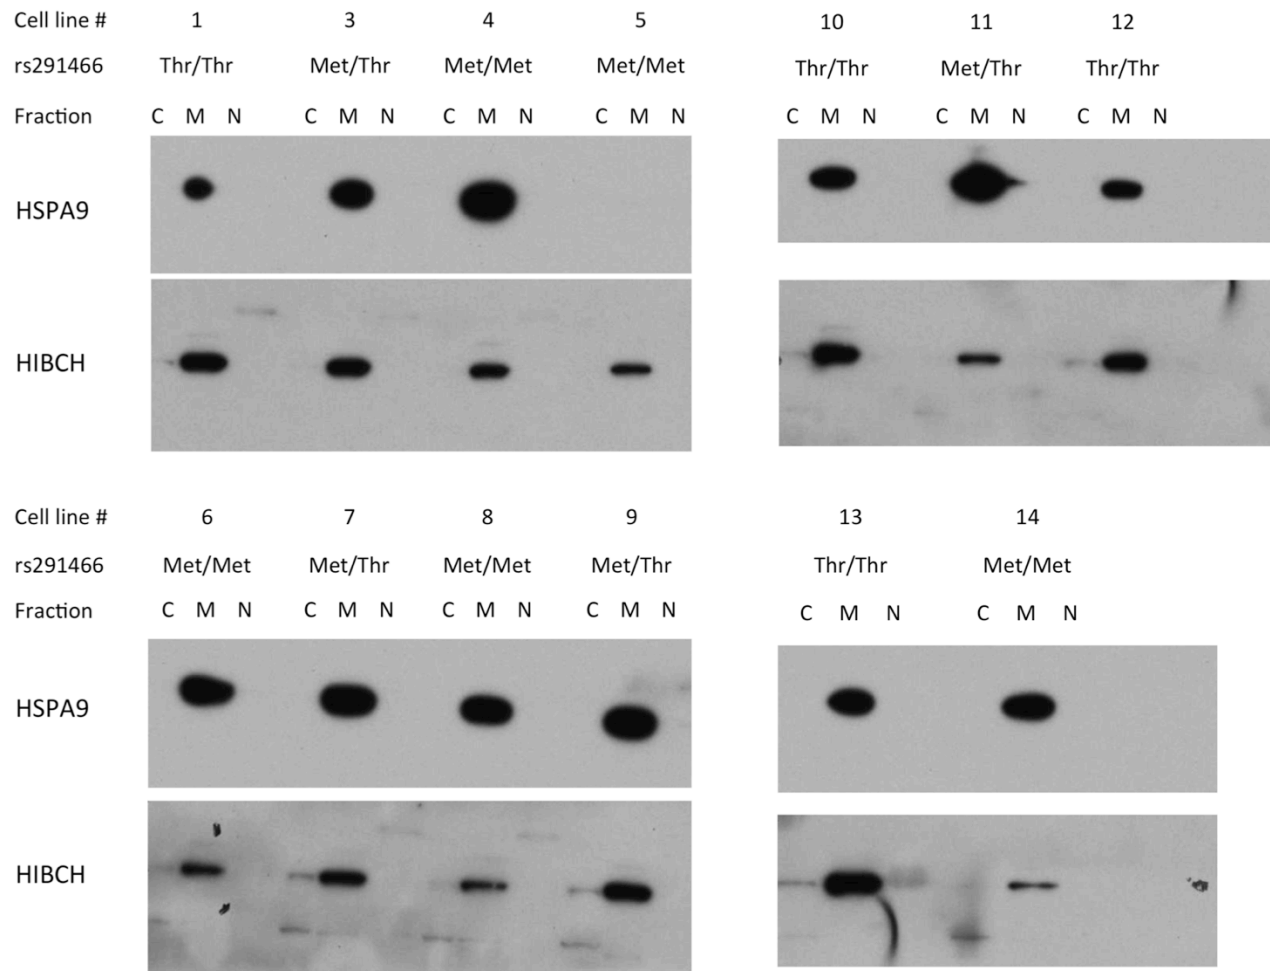

**Figure S5.** Association of *ACSF3* rs1054747 genotype with *ACSF3* mRNA. Left: Relative amounts of *ACSF3* rs1054747 mRNA isoforms expressed in heterozygous individuals. The fraction of RNA-seq reads for each *ACSF3* rs1054747 allele was calculated for 52 heterozygotes using genotype and expression data from the GEUVADIS RNA Sequencing Project, based on the 1000 Genomes EUR samples. Distributions for each allele are shown, and are not significantly different (t-test,  $p=0.92$ ). Right: *ACSF3* mRNA expression by rs1054747 genotype. Distribution of *ACSF3* RPKM (reads per kilobase of transcript per million reads mapped) scores for each *ACSF3* rs1054747 genotype group (2 AA, 52 AG and 391 GG) based on 1000 Genomes EUR samples. The means are not significantly different by genotype group (ANOVA,  $p=0.37$ ).

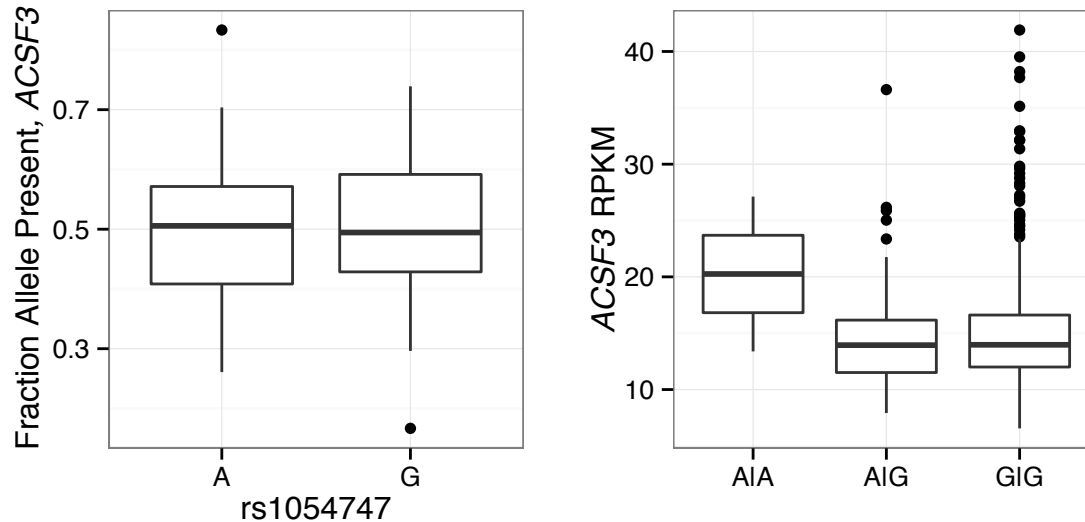



**Table S1.** Genomic control ( $\lambda$ ) results for untransformed and  $\log_{10}$  transformed MMA GWAS of genotyped SNPs after adjustment for age and sex

| <b>PHENOTYPE</b> | <b>Median(of <math>T^2</math>)/0.456 *</b> | <b># of markers with (<math>-\log P</math>value) &gt; 7</b> |
|------------------|--------------------------------------------|-------------------------------------------------------------|
| MMA_raw_AS       | 0.991                                      | 46                                                          |
| MMA_log_AS       | 0.991                                      | 56                                                          |

\* Lambda ideal range is from approximately 0.95 to 1.1

**Table S2.** Seven SNP loci with missense or nonsense variants that show significant association with untransformed or log<sub>10</sub> transformed MMA adjusted for age and sex: association p-values < 5x10<sup>-05</sup>

| chromosome | SNP       | Gene   | Function | Genotyped (G) or Imputed (I) | Beta (raw MMA) | MMA_raw_A S P-value | Beta (log MMA) | MMA_log_A S P-value |
|------------|-----------|--------|----------|------------------------------|----------------|---------------------|----------------|---------------------|
| chr2       | rs291466  | HIBCH  | missense | G                            | -0.038         | 4.92E-52            | -0.088         | 8.42E-89            |
| chr2       | rs1058180 | HIBCH  | missense | G                            | -0.026         | 3.94E-18            | 0.061          | 3.41E-28            |
| chr2       | rs6753459 | C2or88 | missense | I                            | -0.026         | 2.62E-17            | -0.059         | 4.46E-27            |
| chr16      | rs2270416 | CDH15  | nonsense | G                            | -0.042         | 3.40E-12            | -0.098         | 6.22E-19            |
| chr16      | rs455527  | CPNE7  | missense | G                            | -0.026         | 1.72 E-06           | -0.063         | 1.07E-10            |
| chr16      | rs885479  | MC1R   | missense | G                            | -0.025         | 5.79E-06            | -0.059         | 4.43E-09            |
| chr16      | rs7188200 | ACSF3  | missense | G                            | 0.015          | 1.66E-06            | 0.032          | 1.22E-08            |
